# Supplementary material for: Big problem, little answer: overcoming bed agglomeration and reactor slagging during the gasification of barley straw under continuous operation
Source: Royal Society of Chemistry journal article supplement (doi:10.1039/d0se00155d), 2020-01-01
Supplement: d0se00155d1.pdf [file d0se00155d1.pdf]

## Big Problem, Little Answer: Overcoming Bed Agglomeration and Reactor Slagging during the Gasification of Barley Straw under Continuous Operation

Hassan A. Alabdrabalameer<sup>a</sup>, Martin J. Taylor<sup>b\*</sup>, Juho Kauppinen<sup>c</sup>, Teemu Soini<sup>c,d</sup>, Toni Pikkarainen<sup>c</sup> and Vasiliki Skoulou<sup>a,b\*</sup>

<sup>a</sup> B3 Challenge Group, Department of Chemical Engineering, University of Hull, Cottingham Road, Hull, HU6 7RX, United Kingdom.

<sup>b</sup> Energy and Environment Institute, University of Hull, Cottingham Road, Hull, HU6 7RX, United Kingdom.

<sup>c</sup> VTT Technical Research Centre of Finland Ltd, Renewable Energy Processes, Espoo, Finland.

<sup>d</sup> Reteres Oy, Kytömaantie 32, 41390 Äijälä, Finland

### Supplementary Information

**Table S1:** Experimental conditions of the gasification reactor shown in **Figure 1**

| Parameters                      | Values    |
|---------------------------------|-----------|
| Bed Temperature (°C)            | 750-950   |
| Superficial velocity (m/s)      | 0.36-0.42 |
| Bed material particle size (µm) | 250-500   |
| Oxygen in feed (%)              | 1-1.2     |
| Feedstock particle size (mm)    | 1-2       |
| Feeding rate (r/min)            | 15-100    |

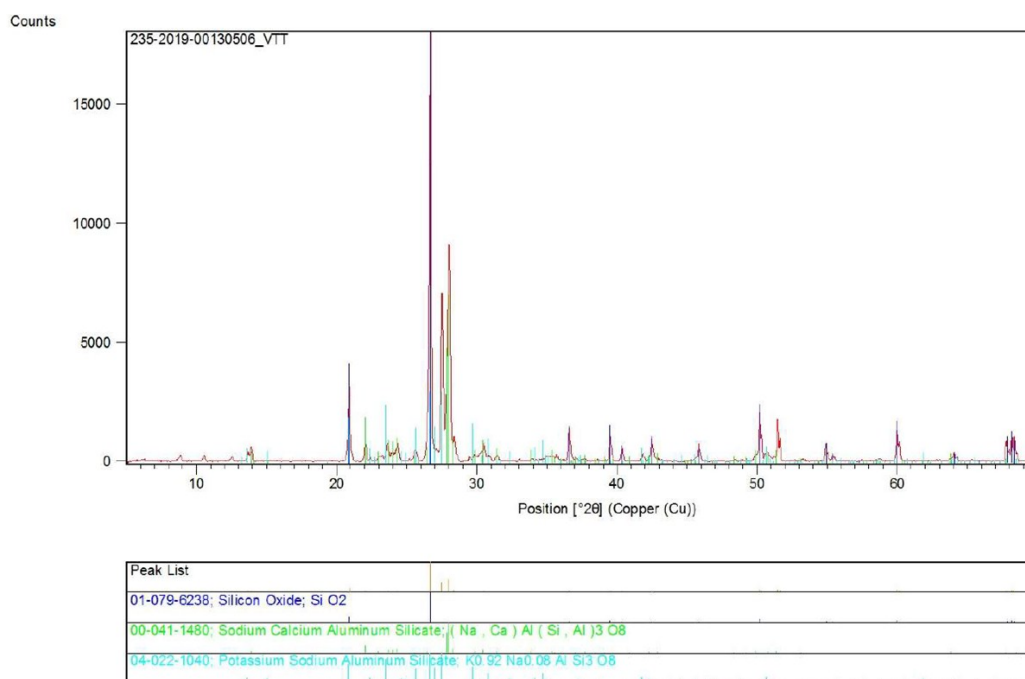

**Figure S1:** PXRD Diffractogram of untreated bed material

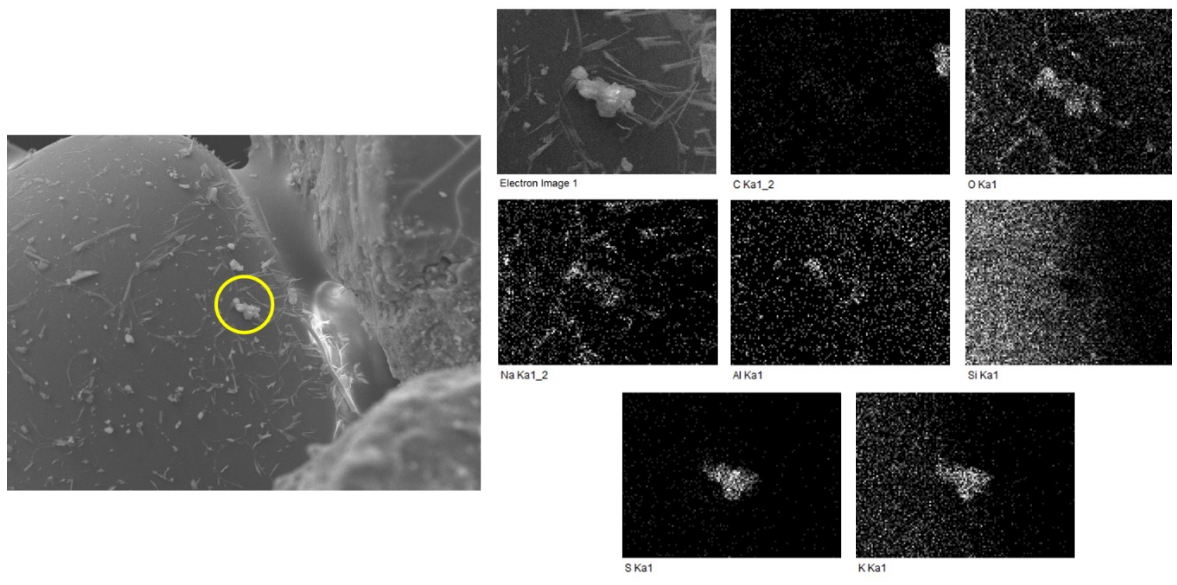

**Figure S2** shows EDX mapping of an inorganic structure observed in **Figure 4a** in the manuscript, this clearly shows the strong signal for K, O and S, suggesting a  $K_2SO_4$  structure.
